# Supplementary material for: Effectiveness of Nootropics in Combination with Cholinesterase Inhibitors on Cognitive Function in Mild-to-Moderate Dementia: A Study Using Real-World Data
Source: MDPI journal article supplement (doi:10.3390/jcm11164661), 2022-08-09
Supplement: s1 [file s1]

**Supplementary Table S2.** Results of ANOVA for mini-mental state examination (MMSE) total score and its six-subscale scores among the three cholinesterase and nootropics combination subgroups in Alzheimer's dementia.

| MMSE                      | Choline alfoscerate<br>(A)<br>(n = 74) | Ginkgo biloba (B)<br>(n =39) | Others <sup>1</sup> (C)<br>(n = 21) | F     | <i>p</i> value | Post-hoc analysis <sup>2</sup> |
|---------------------------|----------------------------------------|------------------------------|-------------------------------------|-------|----------------|--------------------------------|
| Total                     | -0.28 ± 2.57                           | -0.51 ± 2.82                 | -2.81 ± 5.15                        | 5.35  | 0.006          | A > C, B > C                   |
| Orientation               | -0.27 ± 1.87                           | -0.44 ± 1.83                 | -1.10 ± 2.17                        | 1.53  | 0.220          |                                |
| Immediate recall          | -0.08 ± 0.54                           | 0.00 ± 0.32                  | -0.29 ± 1.10                        | 1.48  | 0.231          |                                |
| Attention & calculation   | -0.18 ± 1.36                           | -0.13 ± 1.17                 | 0.14 ± 1.20                         | 0.51  | 0.603          |                                |
| Delayed recall            | -0.05 ± 1.20                           | -0.31 ± 1.10                 | -0.48 ± 0.98                        | 1.39  | 0.254          |                                |
| Language                  | 0.22 ± 1.21                            | 0.26 ± 1.21                  | -0.95 ± 1.86                        | 7.04  | 0.001          | A > C, B > C                   |
| Visuospatial construction | 0.08 ± 0.61                            | 0.10 ± 0.55                  | -0.14 ± 0.48                        | 1.438 | 0.241          |                                |

Values are presented as mean ± standard deviation.

MMSE, mini-mental state examination.

<sup>1</sup>Others include acetyl-L-carnitine (n = 10), nicergoline (n = 10), and oxiracetam (n = 1).

<sup>2</sup>Significant group differences (*p* < 0.05) were conducted via Bonferroni multiple comparisons test.
