# Supplementary material for: Effectiveness of Nootropics in Combination with Cholinesterase Inhibitors on Cognitive Function in Mild-to-Moderate Dementia: A Study Using Real-World Data
Source: MDPI journal article supplement (doi:10.3390/jcm11164661), 2022-08-09
Supplement: s1 [file s1]

**Supplementary Table S1.** Comparison of the distribution of the three types of cholinesterase inhibitor in the cholinesterase inhibitor only group and the cholinesterase inhibitor and nootropics combination group.

|              | ChEI only<br>(n = 410) | ChEI + nootropics<br>(n = 173) | $\chi^2$ | <i>p</i> value |
|--------------|------------------------|--------------------------------|----------|----------------|
| Donepezil    | 353 (86.1)             | 153 (88.4)                     | 0.582    | 0.446          |
| Rivastigmine | 93 (22.7)              | 33 (19.1)                      | 0.935    | 0.334          |
| Galantamine  | 28 (6.8)               | 19 (11.0)                      | 2.832    | 0.092          |

Values are presented as number (%).

ChEI, cholinesterase inhibitor.

If subjects were prescribed multiple types of cholinesterase inhibitor, each of them was separately included in each types of cholinesterase inhibitor.
